# Supplementary material
Source: PubMed Central journal article supplement (PMC2637401)
Supplement: NIHMS82934-supplement-01.pdf [file NIHMS82934-supplement-01.pdf]

## Supplemental Data

Cell Metabolism, *Volume 8*

### Mediobasal Hypothalamic p70 S6 Kinase 1 Modulates the Control of Energy Homeostasis

Clémence Blouet, Hiraku Ono, and Gary J. Schwartz

Supplementary Figure 1

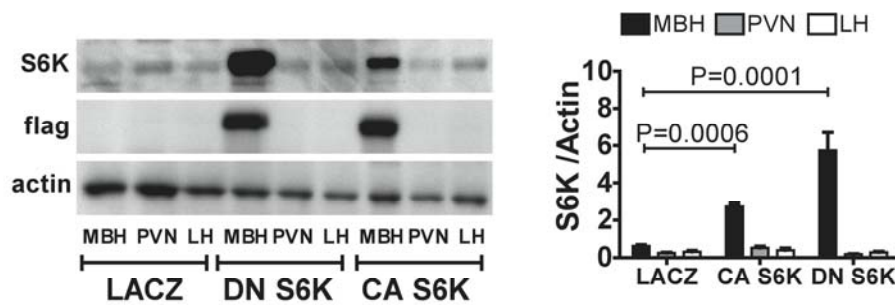

**Supplementary Figure 1: Adenovirus spread control.** S6K protein level in MBH, PVN (paraventricular nuclei of the hypothalamus) and LH (lateral hypothalamus) of rats expressing LACZ (n=4), CA S6K (n=4) or DN S6K (n=4). All data are means  $\pm$  SEM.

## Supplementary Figure 2

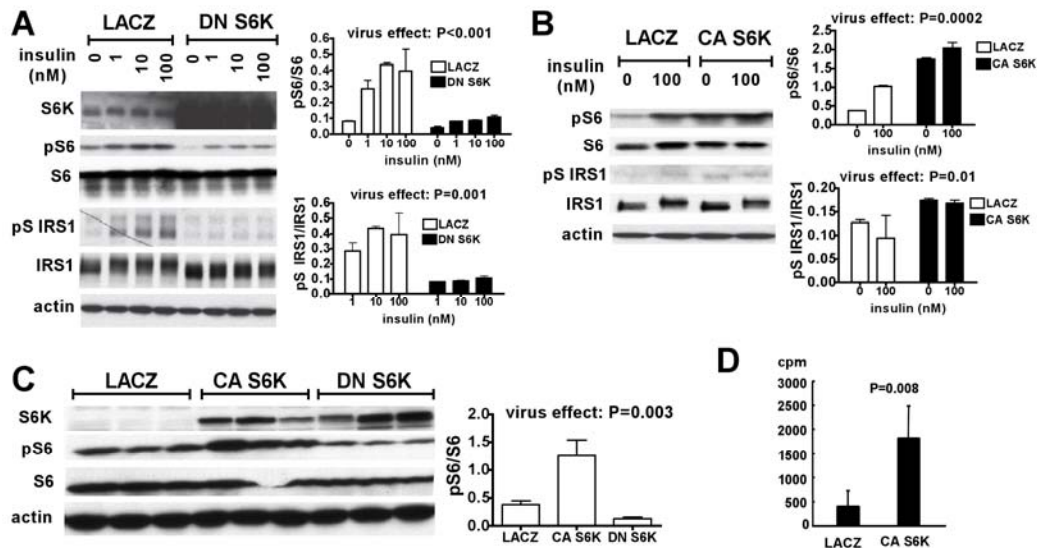

**Supplementary Figure 2: Adenovirus functional validation.** (A) Insulin-induced phosphorylation of S6 ribosomal protein (S6) and serine-phosphorylation of IRS1 in hypothalamic GT1-7 cells infected with LACZ or DN S6K. (B) Insulin-induced phosphorylation of S6 and serine-phosphorylation of IRS1 in hypothalamic GT1-7 cells infected with LACZ or CA S6K. (C) S6 phosphorylation in MBH of rats expressing LACZ (n=6), CA S6K (n=6) or DN S6K (n=6) rats. (D) S6K enzymatic activity in MBH of rats expressing LACZ (n=4) or CA S6K (n=4). All data are means  $\pm$  SEM.

## Supplementary Figure 3

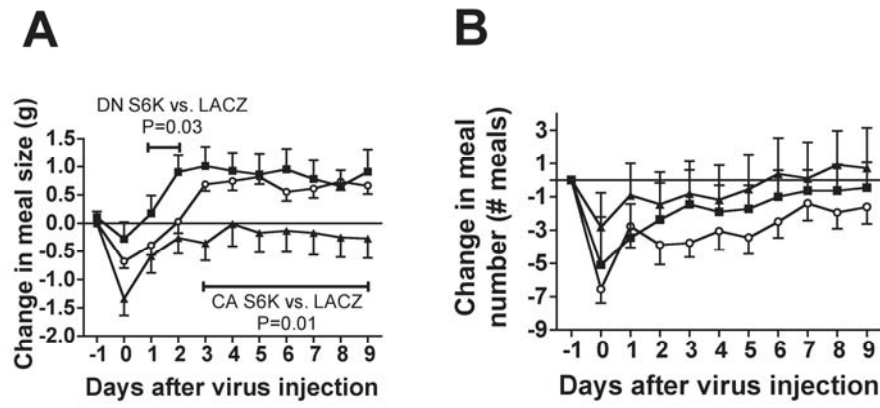

**Supplementary Figure 3:** (A) changes in mean meal size and (B) changes in daily mean number after MBH injection of CA S6K (n=12, filled triangle), DN S6K (n=13, filled square) or LACZ (n=18, open circle). All data are means  $\pm$  SEM.

## Supplementary Figure 4

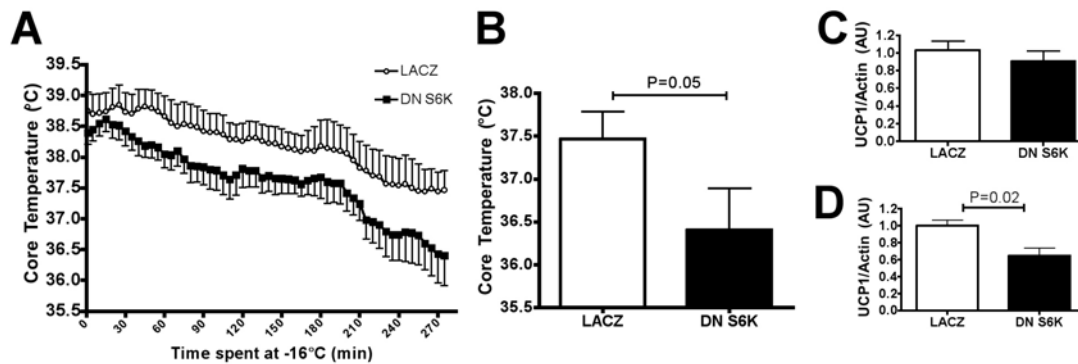

**Supplementary Figure 4:** Core temperature (A) during a 5 hr cold challenge at -16°C 4 days after adenoviral injection in DN S6K (filled square, n=5) and LACZ (open circle, n=5) rats and (B) after the 5 hr cold challenge. Intrascapular brown adipose tissue UCP1 (C) mRNA level normalized to actin and (D) protein level normalized to actin in LACZ (n=5), and DN S6K rats (n=5). All data are means  $\pm$  SEM.

Supplementary Figure 5

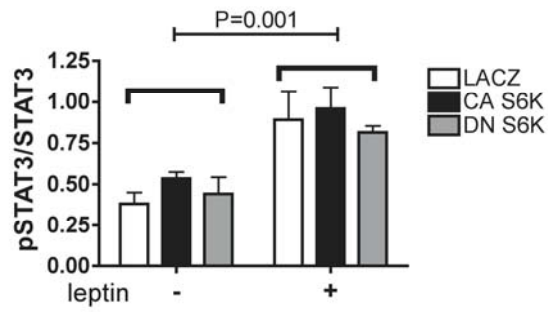

**Supplementary Fig. 5:** MBH leptin-induced STAT3 activation in rats expressing LACZ (n=4), CA S6K (n=4) and DN S6K (n=4) 30 min after MBH aCSF or leptin injection (150 ng in 150 nl per side). All data are means  $\pm$  SEM.

## Supplementary table 1

---

**Supplementary Table 1**                      **PCR primer sequences**

---

AGRP    Forward TGGCAGAGGTGCTAGATCCA

Reverse GCACAGGTCGCAGCAAGGTA

NPY     Forward CCGCCATGATGCTAGGTAAC

Reverse TGTCGCAGA GCGGAGTAGTA

POMC   Forward: ACCTCCGAGAAGAGCCAGAC

Reverse: GGCCTTGGAGTGAGAAGACC

UCP1   Forward: GCCTTCAGATCCAAGGTGAA

Reverse: CGAGATCTTGCTTCCCAAAG

Actin   Forward: CTGGAGAAGAGCTATGAGCTGCCT

Reverse: CTCCTGCTTGCTGATCCACATCTG

---
